# Supplementary material for: RV144 HIV-1 vaccination impacts post-infection antibody responses
Source: PLoS Pathog. 2020 Dec 8;16(12):e1009101. doi: 10.1371/journal.ppat.1009101 (PMC7748270; doi:10.1371/journal.ppat.1009101)
Supplement: S2 Table — Samples (listed vertically) were assessed at 1- and 3- years post-diagnosis. Breadth indicates the percentage of viruses neutralized from the panel of 34 diverse viruses (listed at top horizontally) with an ID40>40. Potency indicates the geometric mean titer (ID50) of all viruses. Non-specific neutralization as mediated by MuLV. Plasma that neutralized MuLV ID50 >20 was excluded from analysis (N = 45 samples). The table was sorted by MuLV neutralization, Treatment Group, and year from diagnosis. (XLSX) [file ppat.1009101.s002.xlsx]

## Sheet: S2 Table
			SV-A-MLV-env	KER2018.11a	Q168ENV.a2	Q23.ENV.17	Q769env.h5	RW020.02	SF162	B6101.1	BaL.01	BG1168.1	CAAN.A2	JR-FL	JR-CSF	PVO.04	THRO4156.18	TRJO4551.58	TRO.11	YU2.DG	DU156.12	DU422.1	GS-015.ec12	93MW965.26	ZA012.29	ZM106F.PB9	ZM55F.PB28a	3337.2.06	A03349M1.vrc4a	T247-23	93TH966.8	CM235	CM244.OR.1	CNE59	R2184.04	CRF02_AG clone 235	CRF02_AG clone 271
Pub ID	Treatment	Year	n/a	A	A	A	A	A	B	B	B	B	B	B	B	B	B	B	B	B	C	C	C	C	C	C	C	CD	D	D	AE	AE	AE	AE	AE	AG	AG	Breadtha	Potencyb
AA002	0	1	20	20	20	20	20	20	265.321	20	25.5072	20	20	20	20	20	29.0223	20	20	20	20	20	1699.45	2105.52	20	20	20	20	20	20	20	28.9689	20	20	20	20	91.7535	0.117647	30.3619
AA003	0	1	20	28.9679	33.1584	24.7088	38.5746	58.9816	4308.08	85.0785	135.635	163.176	49.5387	45.5941	47.1868	20	65.4263	58.1644	90.7029	30.2196	174.313	20	807.022	10706.3	30.2	27.3703	30.5538	20	30.6923	69.3044	1249.6	302.493	183.297	458.542	28.0248	57.3172	80.4524	0.617647	87.9974
AA004	0	1	20	48.9092	31.6985	44.462	41.0201	41.446	713.867	20	51.2162	51.2035	37.1211	45.6929	23.7053	46.6504	55.8947	27.3307	41.6483	26.4773	40.4464	23.176	426.936	755.425	26.5	20	55.4597	25.1804	23.391	59.5141	20	20	51.8351	94.0432	31.8869	63.7222	53.087	0.588235	47.3416
AA011	0	1	20	20	20	20	20	20	1636.72	20	119.69	20	20	28.4322	20	20	20.3683	20	20	20	20	20	294.335	1213.21	20	20	20	20	20	20	20	20	20	20	20	20	43.1098	0.147059	30.3019
AA014	0	1	20	20	20	20	20	20	552.46	20	121.019	20	20	20	20	20	20	20	20	20	20	20	691.602	2143.14	20	72.6258	20	20	20	20	20	33.4562	20	20	20	20	110.418	0.176471	32.8284
AA017	0	1	20	32.9152	20	25.5455	29.5822	44.7149	4581.06	20	87.9486	20	20	20	52.0655	20	44.9572	20	25.2972	26.3165	39.235	20	1257.42	3318.56	26.3	20	21.3902	20	20	24.7322	26.2947	44.3034	20	31.6415	29.3193	20	76.205	0.264706	41.5479
AA019	0	1	20	20	20	20	20.5405	20	178.899	20	79.5877	32.9566	25.5329	20	30.7673	20	34.0104	20	20	23.492	20	20	257.874	596.852	23.5	20	20	20	20	20	45.8139	118.409	20	47.4773	20	20	61.8398	0.235294	32.1884
AA025	0	1	20	20	20	20	20	20	602.884	20	38.7158	20	20	20	20	20	25.7959	20	20	20	20	20	563.273	1460.34	20	20	20	20	20	20	20	62.36	20	111.864	25.0764	20	55.6544	0.176471	32.0735
AA032	0	1	20	21.8492	20	20	20.5798	22.7546	31662.9	20	29.1655	30.4774	21.0016	20	20	20	40.2213	20	20	20	50.2154	20	252.088	620.596	20	20	20	20	20	20	35.584	30.9197	22.7124	87.2076	27.3368	32.614	27.1241	0.176471	35.7698
AA035	0	1	20	20	20	20	20	20	173.372	20	20	28.1096	20	20	20	20	24.3589	20	20	20	20	20	783.524	2028.76	20	20	20	20	20	20	20	20	20	20	20	20	63.5402	0.117647	28.583
AA037	0	1	20	54.956	20	26.5145	38.9089	45.1277	912.79	24.6908	126.85	113.116	34.2086	61.4074	60.357	25.9618	101.759	21.6504	94.0986	56.8929	232.578	40.9362	1248.15	1387.43	56.9	20	23.5523	22.1717	20	50.6736	45.9721	124.69	60.5431	512.955	71.2374	124.294	92.4989	0.676471	71.124
AA038	0	1	20	20.9576	20	20	20	20	95.3069	20	20	47.9823	20	20	20.664	20	41.4389	20	21.6837	20	20	20	81.2637	50.2531	20	20	20	20	20	20	20	20	20	20	20	52.12	20	0.176471	24.2893
AA040	0	1	20	20	20	20	20	20	743.134	20	24.9975	20	20	20	20	20	48.281	20	20	20	20	20	621.862	831.751	20	20	20	20	20	20	20	20	20	20	20	20	46.3616	0.147059	29.0785
AA041	0	1	20	20	20	20	20	20	162.268	20	20	20	20	20	20	20	20	20	20	20	20	20	297.087	471.559	20	20	20.4711	20	36.4311	20	20	20	20	20	20.9363	20	39.5518	0.0882353	26.294
AA042	0	1	20	57.4914	30.2453	83.5899	29.4806	40.7013	2096.65	26.3654	107.919	56.1868	28.5851	26.3025	29.086	39.0295	79.5309	27.2133	47.3356	20.9698	24.9305	20	1507.98	3900.45	21	20	27.1795	20	20	21.4121	46.8902	146.635	58.2558	544.854	48.8018	64.2491	263.557	0.5	61.176
AA115	0	1	20	42.5255	25.1029	20	20	20	818.967	20	39.5074	20	20	20	20	20	20	20	20	20	20	20	129.65	84.7655	41.4791	20	39.2083	20	76.2064	20	20	20	20	20	38.4733	20	64.2458	0.205882	29.5305
AA129	0	1	20	26.5866	23.6032	20	20	20	131.638	20	20	20	20	20	20	20	20	20	20	20	20	20	193.979	393.823	30.2577	20	21.8504	20	31.7999	20	20	20	20	20	27.0569	20	64.2053	0.117647	26.8559
AA051	0	1	20	23.1404	20	30.6232	20	20	50.9449	20	20	20	20	20	20	20	20	20	20	20	20	20	104.436	119.008	20	20	20	20	20	20	20	20	20	20	20	20	28.1017	0.0882353	23.3623
AA057	0	1	20	20	20	20	21.64	20	50.2911	20	20	20	29.1019	20	20	20	20	20	20	20	20	20	66.2116	215.532	20	20	20	20	20	20	20	20	20	20	20	22.3995	39.0249	0.0882353	23.6728
AA059	0	1	20	20	20	20	20	20	54.5154	20	20	20	20	20	20	20	21.5981	20	20	20.4444	20	20	101.247	327.274	20.4	20	23.2684	20	20	20	20	20	25.5101	33.8566	20	20	56.4539	0.117647	24.9341
AA060	0	1	20	39.0239	20	32.1344	20	20	1276.99	20	61.0787	20	20	29.2537	20	20	43.996	20	26.7114	30.0801	20.8092	20	726.06	4509.85	30.1	20	29.5337	34.8293	20	28.2821	48.8608	34.632	26.8337	44.8018	33.6456	31.8293	83.0888	0.235294	40.4925
AA067	0	1	20	20	20	20	20	20	227.47	20	20	20	20	20	20	20	20	20	20	20	20	20	239.055	1988.5	20	20	20	20	20	20	20	20	20	20	20	20	20	0.0882353	26.4561
AA068	0	1	20	41.5439	31.0549	20	20	20	404.717	76.1617	34.3975	33.9561	20	20	20	20	20	20	53.4	20	20	20	121.965	233.318	29.5139	20	20	20	25.4215	20	20	20	20	20	20	20	105.028	0.205882	30.2976
AA069	0	1	20	20	20	20	20	20	1127.06	20	30.6488	20	20	20	20	20	20	20	20	20	20	20	595.979	760.486	20	20	20	20	20	20	20	56.6329	30.2519	20	20	20	47.7673	0.147059	30.0271
AA076	0	1	20	106.576	20	100.655	20	20	191.352	20	48.4829	20	20	21.3879	20	20	27.4564	20	20	24.8	20	20	499.68	1529.5	39.7176	20	53.9869	20	67.5806	45.7767	20	29.2715	20	85.5315	57.3393	50.023	92.9235	0.382353	40.1001
AA130	0	1	20	31.9016	20	20	20	20	496.013	20	47.105	20	20	20	20	20	77.9279	20	20	20	21.1538	20	1852.62	1968.9	22.0479	20	34.3295	20	25.9876	31.4891	36.7323	52.4544	50.3281	25.2283	25.9504	47.9523	219.004	0.264706	38.9674
AA078	0	1	20	113.154	76.0259	51.1747	20	407.725	1777.39	20	417.747	78.8912	20	55.0316	22.1334	203.388	30.3241	20	266.2	357	30.9672	20	415.497	675.913	65.6185	20	116.141	50.918	94.4406	291.018	469.793	488.89	970.454	285.573	49.2431	44.6587	69.5677	0.735294	104.411
AA079	0	1	20	33.5043	20	30.469	20	20	360.115	20	23.0374	20	20	20	20	20	20	27.1769	28	20	29.9839	20.1567	97.3363	362.299	68.943	21.9225	184.929	20	236.988	20	23.6322	20	20	20	159.72	26.4878	180.01	0.235294	36.2848
AA081	0	1	20	48.9581	31.0533	20	20	20	172.381	20	20	20	20	20	20	20	20	20	20	20	20	20	1005.53	1691.11	50.1129	20	37.1368	20	39.3399	20	20	20	20	20	33.6094	20	99.0933	0.176471	32.1863
AA082	0	1	20	20	20	20	20	20	438.51	20	64.0222	20	20	20.3087	20	20	25.7094	20	37.9	76.5	22.7344	20	1992.65	5645.58	20	20	20	20	34.9112	20	20	95.1902	20	362.636	26.6834	20	101.358	0.235294	40.2715
AA086	0	1	20	44.8558	36.0533	20	20	50.7358	278.329	20	29.0074	53.7884	20.6225	54.7443	29.5042	23.0361	32.0303	22.1276	71.9	21.3	36.2981	20	1190.37	2576.86	55.2419	20	95.8604	37.9129	65.164	79.588	148.974	36.0251	256.646	192.699	308.295	34.8918	96.6853	0.5	60.1041
AA088	0	1	20	54.5481	34.5872	39.9806	20	29.9369	179.648	54.302	54.731	27.0715	20	20	20	20	20.2162	20	56	38	20	20	569.341	6418.84	34.5282	20	36.621	20	62.1822	63.6412	23.2129	326.276	136.369	68.0898	28.3411	25.9131	139.962	0.382353	48.3809
AA126	0	1	20	53.3603	37.6169	20	20	48.7025	131.819	20	51.9039	33.131	20	20	20	20	20	20	25	20	20	20	717.45	1932.71	41.8739	20	30.5323	20	44.9975	25.2293	58.9563	40.2761	22.5779	91.5566	41.3515	20	159.993	0.382353	38.9421
AA117	0	1	20	20	20	20	20	20	50.2629	20	20	20	20	20	20	20	20	20	20	20	20	20	111.593	154.929	20	20	20	20	20	20	20	20	20	20	20	20	20	0.0882353	22.9567
AA094	0	1	20	24.6361	20	20	20	20	327.413	20	20	20	20	20	20	20	20	20	20	20	20	20	922.126	273.533	25.036	20	27.5774	20	20	20	29.9123	25.0579	20	20	24.2527	20	39.8563	0.0882353	28.055
AA098	0	1	20	33.0695	20	27.2456	20	20	157.022	20	37.2814	20	31.5823	20	20	20	21.523	20	20	20	65.4113	20	527.852	4664.64	49.7817	20	40.5591	20	29.8854	42.1058	61.8176	31.8105	20	146.185	46.0578	20	156.961	0.323529	39.5437
AA102	0	1	20	21.4655	20	20	20	20	111.199	20	20	20	20	20	20	20	20	20	20	20	20	20	44.4346	22.5452	20	20	20	20	20	20	20	20	20	20	20	20	20	0.0588235	21.6558
AA105	0	1	20	44.4414	28.7426	20.5319	20	20	942.841	20	126.021	20	20	20	20	20	20	20	20	20	20	20	177.073	775.213	20	20	47.0353	20	37.1185	20	20	20	20	20	21.3775	20	90.2332	0.205882	31.7994
AA107	0	1	20	41.7507	20	20	20	20	150.542	20	20	20	20	20	20	20	20	20	20	20	20	20	473.704	815.195	20	20	26.1856	20	29.9278	20	20	92.6804	35.9849	20	20	20	79.0618	0.176471	30.008
AA119	0	1	20	25.3052	20	43.7921	20	20	93.7252	20	20	20	20	20	20	20	20	20	20	20	20	20	245.841	287.755	27.285	20	58.8867	20	20	20	20	20	20	20	20	20	76.3032	0.176471	27.2112
AA110	0	1	20	20	20	20	20	20	75.4862	20	20	20	20	20	20	20	20	20	20	20	20	20	483.575	640.867	20	20	20	20	20	20	20	20	20	20	20	20	50.8418	0.117647	25.9949
AA112	0	1	20	20	20	20	20	20	835.427	20	45.2222	20	20	20	20	20	20	20	20	20	20	20	728.514	1101.28	20	20	20	20	20	20	20	29.2541	20	20	20	20	48.8888	0.147059	29.6841
AA002	0	3	20	27.1982	63.7718	215.328	54.0277	73.8501	1175.34	20	128.19	20	22.9596	67.2043	26.4827	20	85.0478	20	31.8184	32.4014	67.0972	20	5345.52	7530.95	51.3555	43.271	30.2256	24.7983	53.7668	48.8723	30.2325	567.804	63.5064	73.6672	27.6679	30.056	692.527	0.558824	71.9958
AA004	0	3	20	20	20	20	45.5668	41.5771	566.121	20	94.4217	20	21.065	23.9054	20	20	50.0409	20	20	28.281	45.4546	20	650.231	1743.77	20.9141	31.1057	20	20	20	38.3405	20	23.304	20	73.0032	20	28.6496	59.9461	0.294118	36.8268
AA005	0	3	20	20	20	21.7821	20	20	312.475	20	76.4225	20	20	23.4451	20	20	89.8916	20	36.4386	20	20	20	1197.91	4418.73	20	20	20	20	20	20	28.251	91.1452	23.0617	367.865	54.9417	34.2369	195.136	0.264706	41.3183
AA011	0	3	20	20	20	20	20	20	4571.72	20	476.753	20	20	49.5825	20	20	47.912	20	20	25.0583	37.0202	20	791.64	3785.79	20	20	20	20	20	43.1753	20	73.3995	46.7756	105.883	20	20	49.7867	0.323529	42.5216
AA014	0	3	20	37.7632	25.1394	31.2805	59.53	62.0689	2717.61	20	261.406	20	24.9179	57.2619	24.8158	20	52.8977	20	24.2597	30.1461	68.6951	20	1094.46	3563.89	28.4437	71.0949	20	45.7602	20	40.463	151.564	580.619	67.354	426.72	47.5762	45.1747	241.271	0.558824	67.7682
AA016	0	3	20	49.4374	61.509	42.5481	74.1377	102.865	1119.12	64.8878	268.83	114.591	59.4696	116.499	123.519	46.2045	128.753	35.6296	148.822	124.582	345.488	72.6086	9613.05	26709.7	80.4081	41.3249	52.0215	105.605	71.6702	107.68	102.569	407.875	76.9398	1789.21	147.682	154.415	462.929	0.970588	156.487
AA017	0	3	20	30.2049	20	20	27.2091	70.8643	3693.61	20	181.682	21.5553	20	45.5047	20	20	71.4477	20	20	20.7776	49.4379	20	3074.85	15258	20	20	20	20	20	39.9731	20	66.06	21.1209	106.142	20	20	107.919	0.323529	47.6156
AA019	0	3	20	20	54.1126	25.1929	69.8082	159.377	171.04	20	247.631	64.2247	30.8839	145.991	81.5923	41.8524	47.6789	80.895	97.488	130.576	173.593	34.8624	651.938	2312.31	88.9315	76.9456	75.8216	31.1718	43.7372	98.4109	134.426	375.707	205.389	729.253	75.7364	49.9341	191.879	0.823529	97.581
AA022	0	3	20	20	48.0964	20.0846	45.6196	43.5793	611.577	20	80.9242	50.3888	21.4812	29.4408	20	20	63.7652	20	20	29.4093	73.748	20	971.566	6888.23	30.2361	37.5226	20	20	27.789	54.3419	20	24.2874	20	180.728	20	20	48.3404	0.382353	44.132
AA023	0	3	20	64.0888	56.2618	55.6334	56.711	89.7655	3830.77	20	153.874	48.0822	50.8355	72.1104	31.6116	56.4421	51.5596	47.6771	47.9851	58.8626	37.6983	34.5966	2454.1	3695.48	39.7656	44.0275	53.3969	85.4583	82.4106	68.6609	165.56	479.693	205.144	486.245	185.445	104.488	135.542	0.852941	103.207
AA025	0	3	20	68.5754	98.0714	573.088	104.715	69.4577	668.552	20	71.4082	29.5946	20	99.6231	52.6399	37.9823	42.5831	20	22.2722	23.6698	210.815	148.085	1041.23	2517.24	45.9028	102.022	20	67.1494	63.0734	61.106	71.7511	301.818	375.32	261.574	47.4254	36.4393	70.6186	0.735294	86.5248
AA027	0	3	20	57.8224	77.2153	41.7454	60.6819	90.9485	653.479	49.0824	147.288	107.781	42.2663	158.906	59.6791	50.1485	61.6233	34.8233	166.174	61.6368	183.23	63.6451	1137.85	1552.78	63.4339	42.2742	34.9887	53.3192	48.9948	87.1855	106.505	415.757	55.1755	1015.66	133.363	76.7638	120.742	0.941176	103.408
AA029	0	3	20	41.0074	39.4593	22.0189	44.421	62.5631	652.432	20	100.644	34.0143	46.0245	59.0653	20	37.2048	74.5771	28.6825	24.8225	40.3508	40.6317	32.7212	1602.22	882.09	39.6632	38.2934	31.5041	36.2784	42.4894	38.8538	20	26.9463	32.9442	44.8531	27.1626	35.4852	54.172	0.441176	49.554
AA032	0	3	20	46.1384	50.1057	41.1803	42.5721	51.6546	8145.2	20	45.047	43.0527	41.8835	41.3722	29.4683	25.1797	108.889	20	106.701	24.2473	83.2045	115.395	1473.32	6641.6	127.139	25.4694	30.643	37.4253	20	24.5868	83.5692	167.305	42.5525	632.692	71.2486	91.9458	82.9997	0.705882	77.446
AA037	0	3	20	20	20	131.12	20	20	2613.1	46.3403	91.7233	53.9515	20	34.0836	20	20	59.9079	20	390.416	26.8608	79.8845	20	3137.91	4954.68	499.784	20	20	20.7196	20	20	150.828	364.332	87.5773	624.866	83.6036	20	57.2052	0.5	69.8775
AA038	0	3	20	20	20	40.9206	21.1258	20.4146	241.073	20	25.64	20	20	20	20	20	28.9227	20	27.2823	22.4839	20	20	87.5568	191.005	89.0383	20	20	20	20	20	20	23.3629	22.6335	22.7659	20	26.1498	53.8556	0.176471	27.8187
AA040	0	3	20	20	20	34.3942	20	20	1832.11	20	45.5621	20	20	20	20	20	61.4845	20	20	20	20	20	1390.38	1116.06	20	20	20	20	20	20	20	20	20	20	20	20	21.912	0.147059	31.4224
AA041	0	3	20	30.9603	20	41.3254	34.2046	41.3794	314.915	20	47.1428	38.918	190.607	201.517	124.791	27.6339	56.1975	20	814.117	27.1038	56.9976	123.688	475.797	1656.06	768.405	67.7994	104.432	122.026	23.2835	21.3266	100.675	39.3442	29.6547	60.2103	139.991	35.4527	40.3323	0.617647	73.9904
AA049	0	3	20	173.717	58.5858	108.614	74.0215	236.897	4225.98	71.2854	276.634	46.4761	32.0192	65.1881	43.0359	82.2754	123.818	207.877	71.9928	38.8805	113.82	55.7176	11340.5	26951.3	194.921	37.6955	39.2222	31.8782	20	22.8296	424.854	1157.26	340.181	159.018	87.2429	20	257.384	0.764706	136.45
AA115	0	3	20	46.2792	31.4231	45.3327	50.3851	35.3152	2410.9	20	151.094	37.2888	40.7871	60.4838	31.2174	24.6399	78.3007	32.0052	25.5215	22.9165	31.3535	64.8376	434.492	731.405	54.0003	20.2205	27.8888	20	37.8236	22.3152	55.534	42.4521	34.7272	51.7322	45.756	37.1324	89.1812	0.5	51.7614
AA129	0	3	20	35.0705	20	20	33.9995	50.1719	489.947	20	38.2327	46.8734	31.099	32.1151	29.1939	27.4297	47.1647	24.3746	49.7256	24.1023	75.332	20	665.643	1444.37	24.1	20	20	20	25.7042	32.7515	22.2284	40.5172	39.8266	49.2226	23.1158	55.7665	115.395	0.352941	42.7628
AA051	0	3	20	20	20	37.8896	20	20	1219.81	20	20	20	20	20	20	20	20	20	20	20	20	20	327.802	496.633	20	20	20	20	20	20	20	20	20	20	20	20	20	0.0882353	27.4443
AA054	0	3	20	796.122	20	342.273	20	20	944.836	20	87.7632	20	20	73.8353	20	20	20	20	20	20.6	20	20	430.405	909.64	20	20	20	20	20	20	179.564	1021.49	96.154	232.348	56.384	25.8364	62.4855	0.382353	52.2686
AA054	0	3	20	395.163	63.9271	333.345	32.9225	32.1015	1139.37	34.7477	113.229	48.4962	24.8989	125.12	34.9397	20	65.493	22.003	33.4294	33.5401	67.1056	81.4556	485.798	1264.19	25.7007	29.2634	22.1002	20	20	20	256.368	1108.96	109.802	296.111	73.957	80.1959	69.0412	0.558824	76.5838
AA116	0	3	20	640.27	145.054	1771.53	38.3874	59.0047	760.595	53.7526	138.329	20	20	96.893	53.8175	30.8878	20	20	73.0819	29.6828	117.759	65.4201	872.6	3268.66	20	22.5035	25.225	20	100.614	70.0295	211.282	625.189	590.689	181.86	129.75	20	70.8735	0.647059	93.666
AA056	0	3	20	20	20	34.4169	20	20	44.0942	20	20	20	20	20	20	20	20	54.4332	20	20	20	20	96.6273	125.44	20	30.3591	20	20	20	20	301.236	647.411	79.3804	33.7721	20.1404	20	26.0532	0.205882	30.6607
AA059	0	3	20	50.5063	25.6869	57.5312	42.1788	35.5231	59.6404	20	21.336	33.8696	31.9191	37.6094	27.476	20	42.7177	20	20	28.176	62.3348	30.8872	535.563	944.545	58.0759	35.4178	43.1708	28.5656	34.4994	52.1546	67.7472	219.681	115.605	58.7835	47.8373	43.4386	88.1475	0.529412	48.7846
AA060	0	3	20	20	20	20	20	20	2214.66	20	142.493	20	20	20	20	20	20	20	20	20	20	20	2475.51	17027.8	20	20	20	20	20	20	77.1042	20	20	50.9451	20	20	102.167	0.205882	38.3687
AA069	0	3	20	46.3502	20	150.232	20	20	3083.48	20	190.484	26.5406	20	35.018	23.7697	20	55.5116	20	23.6806	25.7442	23.4305	20	2248.88	7047.85	20	20	52.4782	23.3455	20	63.729	82.9946	141.694	47.6561	262.773	43.225	25.5791	92.537	0.441176	55.995
AA075	0	3	20	71.7951	43.966	48.2585	20	20	301.607	20	20.1622	20	231.193	20	37.7504	20	63.0227	20	20	20	20	20	1177.42	2188.35	20	83.5562	20	20	20	197.851	314.465	163.206	20	176.391	95.0246	20	35.16	0.411765	50.578
AA076	0	3	20	20.2432	20	33.5918	27.2273	24.8028	257.452	20	24.7858	32.3024	20	20	20	20	83.4301	20	20	24.4316	20	20	1098.86	5412.11	45.9217	20.7753	32.2109	20	20	20	20	40.6274	20	184.944	42.5435	38.8072	82.0156	0.264706	38.9315
AA078	0	3	20	20	286.462	276.224	20	204.738	2665.54	82.2841	806.26	97.1174	20	69.2131	20	405.793	54.55	117.834	261.988	590.505	233.143	20	772.1	3125.08	241.608	447.681	58.6408	85.5114	70.6159	65.7082	754.044	908.275	625.059	558.042	272.464	20	81.2477	0.823529	166.984
AA079	0	3	20	20	20	20	20	20	187.829	20	20	20	20	20	20	20	24.325	20	20	20	20	20	144.943	1753.32	20	20	20	20	20	20	20	20	20	20	20	20	64.117	0.117647	26.882
AA081	0	3	20	20.2917	20	21.7259	20	23.5408	339.834	20	25.6016	20.6565	20	20	20	20	31.8058	20	20	28.2318	56.8641	20	4053.07	15245.5	20	20	20	20	20	20	146.893	101.898	35.6618	50.3882	71.6199	34.8915	176.006	0.264706	43.3545
AA082	0	3	20	67.2643	95.5998	80.517	24.6741	106.186	1149.26	104.106	168.81	153.534	21.2446	127.965	79.745	30.4161	175.192	96.7812	250.166	306.224	268.072	87.8188	6402.99	31375.4	63.7475	25.1102	30.7382	97.6232	60.7988	42.7806	157.319	350.524	46.8395	2801.28	207.947	98.7238	869.268	0.852941	154.663
AA083	0	3	20	20	50.9948	297.999	20	21.6351	409.869	20	53.561	39.8037	21.0919	39.7504	20	20	55.498	20	24.2345	30.5551	20	20	469.753	6773.88	40.265	20	29.6806	20	20.4186	60.4074	87.5056	77.9099	20	97.5401	59.5321	20	69.8377	0.411765	46.5864
AA088	0	3	20	27.2083	76.5587	36.591	65.5938	28.7274	467.93	87.9722	115.851	55.7182	20.5102	259.495	30.5026	20	56.9509	20	116.874	52.7438	20	20	2182.1	17821.3	20	49.2223	20	20	20	20	29.0366	174.152	55.9668	427.401	27.4117	34.0192	184.36	0.5	65.0336
AA091	0	3	20	20	20	22.9497	20	30.4554	246.301	20	54.5712	20	20	20.7905	20	20	38.7668	20	71.14	20.1647	59.0571	20	1137.32	2854.12	20	20	20	20	20	20	20	49.0585	20	63.1719	45.2187	22.768	54.557	0.294118	36.1552
AA117	0	3	20	24.1631	46.7895	84.9253	35.0552	53.7024	1338.82	20	67.8834	39.1634	20	25.0408	20	20	71.396	20	20	20.4654	35.0046	20	1497.43	1346.42	35.8612	20	23.9336	48.525	29.5744	25.3376	73.2347	53.8239	66.915	69.3797	45.7113	74.7531	141.52	0.470588	51.0432
AA095	0	3	20	20	20	32.0232	20	20	313.952	20	26.3282	20	20	20	20	20	48.5521	20	20	23.7881	137.738	20	298.451	5047.35	25.1029	20	20	20	20	20	22.4793	33.4527	20.5249	20	23.2514	20	33.3448	0.147059	32.2731
AA099	0	3	20	20	20	45.6563	20	23.4046	219.193	20	34.4145	31.9696	25.7186	34.5888	20	20	54.9576	20	20	36.7632	20	30.2016	537.627	1791.08	26.7418	20.8576	41.9067	20	20	20	29.2355	20	23.9044	31.865	27.9404	34.3167	65.9024	0.205882	35.1461
AA101	0	3	20	20	44.4206	31.8272	20	48.528	865.147	44.6859	100.641	72.0339	20	41.0478	24.1158	20	67.815	20	35.7325	34.4149	20	315.146	3726.49	6626.72	33.376	21.8917	26.8972	20	20	31.1559	147.052	125.6	25.7187	528.121	51.8773	40.1016	196.125	0.5	63.512
AA102	0	3	20	20	20	20	20	20	779.431	20	102.2	20	20	20	20	20	20	20	20	23.4473	20	20	358.26	410.07	20	20	20	20	20	20	20	20	20	54.6926	20	20	37.7267	0.147059	29.3144
AA104	0	3	20	20	20	25.2622	20	20	573.523	20	67.1881	21.8369	20	37.6524	22.5792	20	63.5883	20	34.8604	50.6445	32.2301	33.39	2741.71	6868.39	32.348	20	27.5812	43.5072	20	20	247.135	47.6819	1110.88	64.4277	32.6527	20	192.422	0.352941	52.6929
AA105	0	3	20	20	20	20	20	20	2132.03	20	98.1549	20	20	20	20	20	20	20	20	27.733	20	20	196.366	7181.78	20	20	20	210.535	20	20	69.9287	23.9571	20	34.9361	20	20	24.7007	0.176471	35.2923
AA106	0	3	20	20.0592	41.3515	29.1479	29.4117	22.5948	139.932	22.0297	21.3347	36.2865	22.9088	45.0618	20	25.5677	41.5989	20	20	31.5494	20	41.1113	124.281	151.224	22.9225	20	20	20	20	20	34.6505	20	20	53.3172	33.961	20	47.7036	0.264706	30.4872
AA107	0	3	20	20	26.878	29.6206	20	27.2539	1318.85	20	73.3454	23.1716	24.6125	34.6077	20	20	76.3522	25.6365	20	31.1179	21.2273	42.5387	3619.55	4818.55	20	20	20	22.9029	22.7813	54.5633	112.999	166.787	119.263	72.2103	39.3026	39.3408	156.438	0.352941	52.0447
AA119	0	3	20	22.9941	20	21.9333	40.3905	22.7947	231.946	20	20	20	21.5691	20	20	20	35.009	22.0018	20.8985	20	21.3507	20	959.646	2023.7	20	20	20	20	20	22.9979	20	33.9747	20	20	20	20.1699	79.807	0.147059	31.0048
AA109	0	3	20	41.5403	23.4943	20	20	20	305.299	20	49.6926	23.9718	36.7401	26.7307	20	20.1258	48.4818	20.313	20	32.8006	34.7262	46.1442	5133.53	17160.8	34.9934	20	24.0607	29.5157	25.0405	21.6426	600.803	135.984	34.5572	66.3784	114.951	50.7951	246.827	0.382353	55.0026
AA110	0	3	20	20	20	20	20	20	188.396	20	20	20	20	20	20	20	38.6376	20	20	24.8571	20	20	3543.9	6981.69	20	20	20	20	20	20	20	20	20	49.5956	20	20	180.41	0.147059	33.2265
AA112	0	3	20	20	31.148	20	20	30.8308	4615.08	20	106.416	20	20	20	20	20	20	20	20	25.0794	20	20	2873.13	6198.16	20	20	20	26.1907	20	20	1162.78	338.622	20	27.3339	32.1967	20	101.128	0.205882	46.2316
AA009	1	1	20	24.019	20	20.0232	68.0428	35.449	10485.2	20	126.538	23.3301	25.1018	31.7691	33.9789	20	55.5183	20	22.7798	29.9542	55.5611	20	588.182	1464.69	30	20	36.1709	20	20	20	20	20	20	45.7025	21.1999	33.6862	112.978	0.264706	42.777
AA127	1	1	20	21.9966	20	20	20	20	215.085	20	20	20	20	20	20	20	20	20	20	20	20	20	399.767	825.009	44.8779	20	25.9026	20	57.0006	20	20	20	20	23.6983	23.0961	20	55.7426	0.176471	29.0042
AA121	1	1	20	34.5323	24.6902	20	20	20	389.277	20	35.0296	20	20	20	20	20	20	20	20	20	20	20	455.893	2317.53	37.5055	20	42.1242	20	60.4525	20	20	20	20.6988	20	22.3643	20	52.4902	0.176471	31.7894
AA012	1	1	20	21.9132	20	25.2793	20.2299	20	897.515	20	65.9724	20	20	29.142	20	20	31.7741	20	20	20	20	20	396.135	1363.45	20	20	45.5627	20	21.0449	35.5462	20	20	26.974	41.0013	20	36.6974	116.535	0.205882	34.1768
AA013	1	1	20	55.46	20.5574	27.0682	35.8139	32.5575	230.766	20	31.0651	37.9681	26.4245	30.7436	30.3247	28.7863	51.1879	20	24.0136	20.0131	20	20	908.432	3525.16	20	30.5235	41.5726	30.1222	23.3751	33.15	25.108	20	31.2061	20	33.4482	60.8145	103.981	0.235294	40.1799
AA015	1	1	20	34.461	20	20	20	20	647.772	20	54.8359	23.1628	20	20	20	20	51.6974	20	22.861	26.6864	20	20	1025.89	2082.08	26.7	20	28.7728	20	20	30.2806	20	20	49.8771	20	20	20.7603	251.285	0.205882	35.6803
AA123	1	1	20	20.3708	22.9062	20	20	20.3137	187.319	20	25.5502	21.5351	20	20	20	20	20	20	20	20	20	20	292.365	573.521	42.5175	20	25.4057	20	43.6039	20	35.3673	20	20	21.1387	22.5191	20	69.8143	0.176471	28.9129
AA036	1	1	20	21.2554	20	20	20	20	533.211	20	79.2395	44.7038	20	20	20	20	53.1302	20	49.1966	20	53.5769	20	1822.57	10801.5	20	20	20	20	20	20	20	42.9671	20	105.33	20	20	132.833	0.323529	39.9342
AA048	1	1	20	20.5054	20	20	32.214	20	333.016	20	42.959	26.7535	26.9019	20	20	25.3032	36.5386	20	20	26.3137	20.8929	20	198.085	566.915	26.3	20	20	20	20	20	20	39.6624	20	30.7584	20	20	45.3217	0.147059	29.8947
AA055	1	1	20	28.1673	20	24.3772	26.3887	24.3591	9985.89	20	44.1311	37.9186	24.3718	20	22.6596	22.967	53.0494	20	20	29.9542	20	20	754.268	2322.45	30	20	40.8295	20	20	20.3926	20.4488	22.1835	36.6568	114.62	20	98.2484	94.7612	0.264706	42.5242
AA058	1	1	20	20	20	20	20	20	581.496	20	94.0938	45.0386	20	20	20	20	73.7426	20	20	28.6045	20	20	655.833	3067.69	28.6	20	20	20	20	20	20	33.3404	20	20	20	20	138.546	0.205882	34.6857
AA061	1	1	20	20	20	20	20	20	185.209	20	20	29.2817	20	20	20	20	38.1972	20	33.3847	20	20	20	752.999	2337.48	20	20	20	20	20	20	20	20	20	20	20	20	68.4267	0.117647	29.6491
AA064	1	1	20	20	20	20	20	20	699.145	20	40.6118	20	20	20	20	20	31.4577	20	20	20	20	20	1633.59	3875.95	20	20	20	20	20	20	20	20	20	20	20	20	64.7227	0.147059	31.6064
AA065	1	1	20	20	20	20	20	20	263.81	20	20	20	20	20	20	20	20	20	20	20	20	20	830.673	2812.32	20	20	20	20	20	20	115.656	20	39.8466	59.6948	213.989	20	115.984	0.205882	34.8877
AA084	1	1	20	20	20	20	20	20	46.3945	20	20	20	20	20	20	20	20	20	20	20	20	20	416.375	682.929	20	20	20	20	20	20	20	20	20	20	20	20	40.288	0.117647	25.3863
AA085	1	1	20	20	20	20	20	20	1148.93	20	95.9876	20	20	20	20	20	20	20	20	20	20	20	271.597	1190.17	20	20	20	20	20.2737	20	20	20	20	20	20	20	51.4955	0.147059	29.5513
AA093	1	1	20	20	20	20	20	20	2310.71	20	141.222	20	20	20	20	20	20	20	20	20	20	20	940.975	3164.34	20	20	20	20	20	20	20	20	20	20	20	20	69.2714	0.147059	32.8405
AA096	1	1	20	20	20	20	20	20	154.753	20	20	20	20	20	20	20	20	20	20	20	87.9055	20	291.973	1829.22	20	20	20	20	20	20	20	30.9796	20	20	20	20	29.094	0.117647	28.079
AA097	1	1	20	20	20	20	20	20	102.871	20	20	20	20	20	20	20	20	20	20	20	20	20	416.306	1309.03	20	20	20	20	20	20	20	20	20	20	20	20	59.2293	0.117647	26.7918
AA009	1	3	20	20	20	20	65.908	46.9465	10149.5	20	210.072	29.2754	23.2887	76.6803	20	20	49.2495	20	22.9705	45.9354	117.672	20	7884.38	20035.8	20	22.4327	20	20	20	20	421.584	245.617	20	486.392	20	20	582.175	0.411765	67.3213
AA127	1	3	20	20	20	128.301	37.5044	59.285	933.712	20	47.3903	26.3053	28.5491	33.9926	20.1737	20	51.6763	22.9744	28.1536	20	20	20	1990.22	13272.3	20	20	65.5342	20	20	32.3278	82.3925	273.815	177.435	107.784	50.6591	29.1149	110.782	0.411765	55.2692
AA012	1	3	20	20	25.6664	20	51.3967	48.4216	3093.33	20	290.98	20	20	442.916	20	20	64.7971	157.22	27.7405	35.1869	163.629	20	3158.33	11633.1	20	60.3959	20	20	20	21.9306	48.2221	268.308	21.3462	492.761	281.818	20	182.576	0.470588	71.5815
AA013	1	3	20	20	20	20	30.2249	25.9911	135.806	20	48.2209	21.5735	20	28.0866	20	25.4755	35.3206	20	24.7418	27.3386	20	20	1650.54	6269.58	38.5476	48.5874	20	20	30.7986	28.7694	38.7146	37.7347	44.1361	152.507	76.8826	20	50.3031	0.264706	40.6428
AA015	1	3	20	20	20	20	20	20.6855	1182.03	20	186.836	25.5693	20	31.598	20	20	85.1372	20	20	27.1677	37.6677	20	4549.71	10983	27.1348	20	20	64.6484	20	20	20	21.8298	20	54.6703	20	20	264.309	0.235294	43.3821
AA018	1	3	20	37.2415	28.4309	23.1895	44.7727	62.4678	71.8378	20	55.2471	46.9473	43.1301	63.6056	27.2325	24.7423	58.5118	20	36.3799	42.7408	48.6862	20	92.4174	282.724	50.3523	53.4666	27.4386	20	43.2023	83.4234	26.4921	24.3518	29.0233	69.4003	24.5538	35.5206	20.8467	0.5	39.919
AA020	1	3	20	20	29.8131	20	33.1746	46.345	788.578	25.0481	225.491	41.1416	20	53.9731	47.2295	20	61.3888	36.2364	83.4	79.308	80.3627	20	654.054	698.796	26.4882	22.5913	20	20	31.5708	28.6432	20	73.7795	20	228.41	20	30.4505	53.7918	0.441176	48.2795
AA028	1	3	20	20	37.2866	35.5625	38.0546	47.8102	653.796	20	167.701	64.2623	49.0634	95.4925	57.7266	22.5688	104.101	20	80.8338	45.16	125.136	45.7366	1733.26	23104	36.5924	23.6207	22.718	41.193	48.1498	70.2907	60.3202	118.797	54.0307	447.903	49.0656	116.083	149.355	0.705882	78.7117
AA123	1	3	20	20	20	20	25.7809	28.5962	615.166	20	31.1066	29.1215	28.6175	20	20.2865	20	31.3544	29.182	21.3619	20	20	20	680.533	1549.9	20	20	20	20	20	20	122.337	25.2643	45.7475	36.1592	20	34.241	82.1671	0.176471	35.3999
AA036	1	3	20	20	45.6893	30.8083	20	34.4832	1023.68	48.5599	161.216	33.783	20	48.3785	40.5734	20	112.713	20	210.406	42.1985	42.683	20	7474.01	35177.9	211.871	43.9291	20	20	20	20	30.708	72.081	20	308.751	28.1903	20	265.26	0.5	65.4972
AA048	1	3	20	20	24.3942	23.3534	43.2157	20	930.591	20	41.8572	20	20	20	20	20	32.2158	20	20	20	20	20	715.645	2825.76	20	20	20	20	20	20	20	283.924	20	34.8722	20	20	42.8976	0.205882	34.6444
AA055	1	3	20	20	37.6142	20	20	23.4345	18136.6	20	52.0848	20	20	20	20	20	20	20	20	20	20	20	2004.25	7522.44	20	20	20	29.7051	20	20	48.2633	243.912	20	205.88	40.3319	20	133.855	0.264706	45.3113
AA058	1	3	20	83.7396	33.5966	145.834	20.8432	49.4303	757.487	34.1894	48.6811	41.6127	20	26.1836	20	20	36.6061	20	20	20	20	36.9889	1152.93	8067.41	20	20	48.4563	20	20	20	70.7337	26.8567	58.542	71.9621	32.3	20	157.417	0.382353	47.7088
AA061	1	3	20	20	20	20	20	20	304.312	20	20	21.7802	20	20	20	20	26.4369	20	20	20	20	20	1476.66	4005.27	20	20	20	94.4048	20	20	24.7093	50.5783	20	20	26.2232	20	98.208	0.176471	33.2094
AA062	1	3	20	35.7599	38.6296	37.46	28.3299	25.7835	291.652	20	20	33.8047	20	20	20	20	52.2844	20	20	20	23.6807	20	1080.13	2133.63	28.2617	20	20	20	20	22.3808	38.2706	40.9539	20	77.7896	36.6513	20	70.4884	0.205882	36.5608
AA063	1	3	20	41.5992	20	20	20	20	2527.44	20	47.3243	20	20	20	20	20	20	20	20	20	20	20	11573.3	25251.2	20	20	20	45.5924	20	20	622.182	582.7	236.323	281.026	86.5894	20	351.412	0.352941	59.4012
AA064	1	3	20	25.0565	30.4733	37.8089	29.4147	37.4042	5939.24	20	91.1007	26.2061	20	24.7896	20	20.9054	100.471	20	20	20	20	20	16543.8	19330.9	20	25.6876	29.8706	20	27.3365	22.3969	23.266	26.1701	20	70.6079	29.0536	21.0892	214.476	0.205882	49.4789
AA066	1	3	20	31.8277	70.0273	124.759	30.3138	37.3777	3528.41	23.6242	321.106	33.5805	20	40.6885	20	20	78.5021	20	46.3342	27.4771	42.8529	100.388	2858.04	20110.5	29.6285	20	27.7536	20	21.6606	59.1378	79.0052	100.062	25.6574	440.768	54.6963	54.2891	151.202	0.529412	70.7312
AA072	1	3	20	31.943	39.4342	107.616	38.9177	38.6655	478.755	41.4625	74.1362	46.5037	37.4989	66.7184	41.6331	30.4378	49.1041	21.4879	57.4029	41.9246	31.0869	35.6783	1081.48	3116.75	35.2137	23.2576	24.8242	24.1345	41.5978	58.7342	56.8631	107.935	57.554	260.267	44.5524	53.962	87.2468	0.617647	62.1937
AA073	1	3	20	20	20	244.445	20	20	101.414	20	20	20	20	20	20	20	20	20	20	20	20	20	214.149	205.795	20.3412	20	20	20	20	20	20	72.6734	20	20	20	20	27.3768	0.147059	27.1964
AA074	1	3	20	26.9485	30.3091	50.707	27.6547	26.2917	1282.85	20	46.9114	35.6788	22.7464	38.5665	38.3425	20	69.9333	20	24.5561	35.5269	25.9566	20	3140.98	3660.25	55.7735	46.7264	34.6445	21.7278	23.6118	34.9441	50.1171	38.2361	20	62.5525	30.363	26.5867	132.531	0.323529	48.8453
AA077	1	3	20	20	238.563	20	20.519	20	318.015	20	64.7651	20	20	20	20	20	30.9707	20	20	28.0893	20	20	1316.68	4642.99	20	20	20	20	20	20	21.2563	39.1729	46.6159	92.1692	20	20.1594	135.469	0.235294	38.07
AA084	1	3	20	23.1858	20	31.6318	36.0701	20	288.57	20	44.3102	34.1999	20.0431	25.5924	21.9507	20	61.7799	54.3564	20	34.212	20	25.64	2393.68	6332.71	29.9809	20	20	26.6337	20	25.696	31.0314	39.0389	20	74.3798	36.5148	24.3724	127.337	0.235294	41.7326
AA085	1	3	20	20	31.3114	2404.27	20	22.2883	1699.54	20	141.015	20	20	27.3526	20	20	20	20	45.4631	20	45.1802	20	1204.24	5257.99	24.7459	20	62.6986	70.2321	20	20	111.936	147.367	102.538	49.1535	108.104	20	60.064	0.441176	56.008
AA093	1	3	20	20	26.3517	47.0958	22.8279	44.9907	9809	20.3239	1110.01	79.4953	41.415	92.8193	173.38	20	95.6655	23.7538	20	34.4959	20	20	1383.82	17246	22.9066	20	20	463.281	20	20	31.4475	20	20	31.0734	24.8583	21.6363	125.279	0.382353	60.5921
AA097	1	3	20	20	23.6452	21.9144	20	20.4387	379.294	20	73.8259	35.9905	20	44.873	20	20	58.1496	20	36.2708	41.7973	35.2742	20	2147.54	12506.4	34.1709	20	20	20	20	20	20	258.669	20	39.7222	27.177	20	154.044	0.264706	43.1397
AA103	1	3	20	20	41.9286	50.8971	20	20	64.4443	47.202	47.6137	28.541	20	46.7947	20	20	74.5156	20	37.6183	29.4352	47.1895	274.252	121.156	351.927	32.6402	20	20	20	20	20	376.488	195.086	35.9287	453.358	51.8547	20	30.1617	0.441176	44.2867
AA005	0	1	21.3388	50.4747	20	48.0072	30.5829	46.2803	260.798	20	33.5253	48.8392	39.3171	28.186	39.1984	25.4983	65.2594	31.8099	45.1733	24.0411	75.3065	24.154	403.118	1801.29	24	31.0773	40.3898	26.3304	22.8701	51.3088	26.9919	38.0667	39.9003	124.488	39.7065	55.1228	96.678	0.441176	48.4116
AA122	0	1	35.476	29.9812	53.952	27.9667	20	20	770.636	20	37.0411	20	20	20	23.7107	20	22.7933	20	20	20	20	25.6214	179.622	217.873	26.2237	26.6234	20.5692	20	49.616	45.0708	51.3425	52.0501	32.8753	20	21.2166	57.659	38.5782	0.264706	33.5708
AA122	0	3	40.7598	87.6883	41.8368	50.905	76.8474	65.9315	1524.53	20	41.9622	52.2543	68.9151	49.9033	64.5953	54.1079	99.7389	59.9359	65.4475	20.1523	55.556	27.5083	435.969	964.728	20.2	41.6107	57.5868	43.2089	46.7749	137.291	39.7468	62.959	151.716	30.6318	44.9163	103.61	80.9739	0.823529	68.2324
AA016	0	1	41.9276	42.0086	42.9397	61.2539	34.0043	50.9332	904.517	20	93.5881	54.9112	48.8565	44.0106	98.0128	39.1042	54.8702	38.9813	58.8164	38.8995	55.791	34.7924	3314.9	8541.65	38.9	28.5724	20	41.6949	32.0349	57.6815	54.2963	60.1614	29.9414	382.436	59.0627	58.0773	227.289	0.676471	72.7108
AA022	0	1	25.3364	20.3408	20	20	28.6791	28.9666	222.816	20	73.1573	35.2079	27.2737	20	41.13	21.9588	31.6463	20	68.182	30.0734	24.2316	20	235.566	543.86	30.1	22.0103	20	20	20	58.7774	30.9578	20	20	35.1724	30.3435	20	58.6993	0.235294	34.2368
AA027	0	1	22.2703	39.2388	22.051	34.8488	30.9855	52.4015	802.773	20	107.192	84.5642	33.1019	36.6278	86.209	20	43.4514	20	101.145	33.7756	112.567	31.0498	2128.62	6192.58	33.8	20	20	59.4421	20	51.8795	80.9238	169.424	22.6659	302.235	93.2786	28.4198	126.456	0.5	65.394
AA029	0	1	39.401	41.6907	20	46.4687	20	20	468.486	20	52.0755	20	20	28.0076	20	20	44.0382	20	20	20.378	20	20	797.535	501.273	20.4	25.2228	21.954	20	20	49.1524	32.6602	20	28.9086	46.7007	20.9502	30.9577	27.124	0.264706	33.4427
AA031	0	1	38.569	48.1434	20	60.3863	38.4911	30.6244	298.803	20	28.0079	65.6109	27.0691	20	63.2056	30.1536	62.5829	27.5511	20.5876	39.0198	52.915	20	1650.64	1742.27	39	20	24.4412	20	20	22.1479	37.6304	89.7473	46.3316	80.7105	80.7583	37.8584	90.9146	0.411765	48.4108
AA042	0	3	147.704	77.4881	80.568	93.3289	87.344	73.2616	1677.49	59.7126	126.374	97.3697	82.5015	78.488	71.4088	67.5388	112.113	49.7926	100.54	78.9732	69.582	95.2899	1706.72	2652.1	239.016	90.4699	78.5872	73.3712	70.1901	56.7271	112.788	209.802	177.23	312.362	102.888	84.0886	373.078	1	127.634
AA049	0	1	72.6525	48.2598	21.7653	67.7122	30.5916	39.3498	1505.58	20	111.059	36.3406	20	59.5227	33.7607	33.9029	66.6967	71.7741	35.6388	26.2704	35.6961	33.7389	2739.35	5318.17	26.3	42.1841	38.5979	35.2414	50.3491	66.3466	85.1758	185.022	187.159	97.0907	42.1089	50.4121	123.754	0.558824	69.4937
AA054	0	1	37.1084	21.9832	20	20	26.5249	28.6313	295.884	20	42.6525	31.1603	24.5872	21.9329	27.3348	31.6007	37.0232	20	21.8453	25.7065	28.9858	20	160.935	363.546	25.7	20	20	20	20	20	66.9389	42.2504	53.2535	100.513	23.263	36.5092	39.4537	0.235294	34.2031
AA116	0	1	32.8852	178.032	30.8727	256.723	20.6753	20	152.59	20	26.9081	20	20	22.541	33.0261	20	25.3622	21.9363	20	20	31.9653	20	169.665	340.649	20	26.2735	34.9971	20	20	48.7699	39.8953	70.98	89.3832	21.7422	21.3722	42.1778	39.7058	0.264706	36.7521
AA056	0	1	50.8083	66.4046	20	54.5729	42.1201	34.967	66.6967	20	20	41.8549	30.8314	33.9246	29.6319	26.4493	33.0289	37.5399	28.2864	30.7593	48.2803	21.4377	109.879	150.191	30.8	67.9491	37.5913	51.6305	30.3514	47.7379	63.967	176.391	47.3895	70.4699	51.5108	75.3421	47.6102	0.529412	43.9718
AA130	0	3	116.861	290.497	61.5058	231.789	263.618	233.125	2556.54	20	235.699	214.105	325.977	111.644	272.448	227.419	483.374	272.69	308.315	76.2182	326.463	141.842	5183.55	9796.81	76.2	150.834	146.806	141.908	91.9304	158.535	332.097	406.47	290.768	250.557	166.01	339.032	429.33	0.970588	257.241
AA083	0	1	65.9663	55.6001	26.1938	67.5725	37.1283	35.2301	176.481	20	48.6982	34.2921	34.3004	38.2814	37.4739	20	57.0878	43.4897	46.1	38.2	58.6397	23.8107	172.525	459.467	49.6018	31.2064	42.5762	20	72.9596	55.5623	56.9523	94.9825	21.2656	43.0371	60.2426	39.9866	56.5411	0.558824	47.8454
AA091	0	1	32.5919	96.0582	20	37.4541	24.1881	27.5467	102.569	20	43.6836	23.3982	75.4914	31.2393	25.7567	20	20	31.3811	64.5	39.4	57.2283	20	214.172	242.282	65.4381	20	115.215	20.2375	73.2122	39.5611	66.1349	75.3623	22.6326	33.9197	198.19	52.7984	198.968	0.470588	47.1901
AA101	0	1	40.2885	67.1473	20.4278	37.0415	20	49.0839	128.663	20	43.6445	34.4981	20	23.0588	20	20	30.0373	20	43.8	20	26.5087	20	523.208	708.552	60.4637	20.8113	28.4894	20	45.4621	25.2186	44.5695	29.8375	20	116.557	25.4044	20	85.7853	0.352941	37.7426
AA104	0	1	42.3035	91.8733	33.916	46.6987	21.3514	57.721	96.1217	20	40.0967	42.1768	45.2838	39.0568	39.532	21.6007	48.102	39.1801	66.1	24.5	73.7422	28.935	471.271	1082.96	56.3359	33.3033	67.1783	20	53.4856	33.4239	82.3966	59.1496	34.2644	54.3114	78.3423	47.374	123.863	0.617647	53.414
AA106	0	1	51.587	99.0973	87.4007	98.656	34.0601	27.4708	118.14	20	53.7221	41.9727	62.6972	35.4151	41.7374	22.9903	37.4413	45.5927	39.9	23.4	39.4532	29.016	73.0634	90.3423	74.5687	40.7	117.121	20	94.4952	30.0673	55.334	33.6728	39.4455	49.5135	60.7915	38.6342	98.2108	0.558824	48.3448
AA109	0	1	40.4221	20	20	46.7689	33.2426	59.1292	108.676	20	55.016	42.4933	70.3711	44.487	47.6665	45.9865	50.9307	53.6821	61.4	45.2	47.7277	39.5591	698.876	4602.61	20	52.7914	20	35.227	25.7739	46.4355	48.2332	31.523	39.6552	50.9366	20	54.8916	82.3493	0.647059	51.3714
AA010	1	1	32.5838	73.0637	34.4733	34.2415	49.871	31.1631	1785.61	20	111.611	38.9422	34.6646	39.6629	34.9292	26.2501	69.2072	34.1104	45.7906	31.6453	38.3198	22.1996	384.292	1707.58	31.6	34.0498	83.0474	20	38.3527	26.4943	20	21.489	43.7336	47.0547	40.9835	64.9964	161.63	0.411765	52.6926
AA020	1	1	38.2486	43.3137	20	32.3053	45.3848	49.0229	399.334	20	76.1911	21.1478	21.4656	34.386	47.8379	20	23.7122	20	31.66	23.4379	20	20	140.936	190.359	23.4	20	23.2077	20	20	22.9272	36.4595	27.8554	20	34.4354	26.4147	20	33.7972	0.235294	32.5453
AA021	1	1	24.133	28.3653	43.8919	22.9422	28.0058	23.9452	481.453	20	114.907	53.6378	49.8604	34.7338	71.4681	29.2236	52.151	34.9002	57.6859	72.1805	47.5388	20	797.985	2960.98	72.2	20	20	20	20.4303	22.3047	25.6652	20	23.2096	55.9246	24.8288	34.1314	92.2382	0.441176	47.418
AA024	1	1	37.2226	59.5456	20	44.992	27.885	32.004	180.961	20	145.634	36.2456	36.1437	44.2455	43.6944	26.5295	56.7618	20	36.9311	46.5925	45.2039	33.0401	234.258	1066.01	46.6	32.5701	42.9902	23.7492	20	40.4694	43.3163	32.612	23.6731	42.9672	34.9863	22.5642	71.8942	0.5	44.6716
AA028	1	1	40.1554	41.1111	20	67.6473	51.0568	33.5078	630.868	20	109.911	43.6277	68.4364	29.5429	87.6886	32.8759	57.052	45.1999	72.371	26.9818	117.947	30.5807	968.176	5630.2	27	23.0168	20	20	20	45.8189	71.1739	60.843	61.8329	166.172	53.7471	31.5502	94.5829	0.617647	61.1292
AA034	1	1	32.5585	33.9606	20	33.767	20	20.6307	189.071	20	20	35.0255	20	21.112	30.4058	20	21.7117	20	20.5393	20.3827	20	20	72.5192	126.135	20.4	20	20	20	20	20	23.1431	20	21.9074	20	20	50.4407	23.4948	0.117647	26.0337
AA039	1	1	40.7073	120.597	60.4363	56.6552	44.8481	45.1807	5487.12	20	259.03	91.7082	48.6656	50.3526	47.9876	33.4868	92.888	36.2131	68.8368	27.6743	63.8382	20.0094	1014.49	7942.81	27.7	33.4996	24.8779	23.786	26.8853	36.518	35.6776	23.3834	43.7737	50.3428	20	129.467	106.06	0.588235	67.4623
AA052	1	1	39.9525	35.1113	20	25.0616	20	20	418.7	20	26.7915	20	20	34.4019	20	20	27.0706	20	20	20	20	20	178.088	1197.9	20	24.1774	27.5655	47.6948	20	27.2206	20	25.1991	28.7164	76.7099	28.2674	39.7849	72.7834	0.176471	33.1659
AA125	1	1	21.9518	35.6751	23.22	25.0255	20.7776	20.4096	304.279	20	20	20	22.3401	20	30.1568	20	20	22.3134	20	20	29.0535	20	115.994	61.0583	25.3875	26.9161	45.7052	20	38.0023	20.0536	28.9841	20	20	23.4335	41.5701	59.9185	25.6856	0.176471	28.6548
AA125	1	3	20.8519	30.5638	27.2298	22.0535	42.3901	29.6354	2230.82	20	49.1807	33.4093	59.2328	20.3571	28.1871	28.0174	37.85	39.0414	41.1988	20	29.1368	20	223.142	95.1977	20	30.5478	40.9633	20	28.4856	44.3013	81.6993	55.1085	105.711	75.31	123.294	48.0224	33.4988	0.441176	44.4788
AA062	1	1	42.2759	45.5339	20	47.9695	20	24.9881	124.685	20	22.2655	24.8953	20	23.914	20	20	46.2355	20	20	31.5707	20	20	236.445	390.862	31.6	32.7559	40.2654	20	64.4924	24.2112	30.2054	27.6647	20	34.0699	34.6299	20	46.7416	0.264706	32.6579
AA063	1	1	40.7656	76.3055	20	37.7592	36.2686	42.364	738.725	20	47.0029	53.0662	37.2669	21.8984	46.2728	35.6539	76.6292	20	46.9006	30.4847	42.1678	20	2784.99	8419.64	30.5	26.8944	50.6917	61.1198	20	26.3656	384.235	297.128	171.78	165.628	43.4232	71.7865	209.997	0.588235	70.0048
AA066	1	1	57.123	99.6778	20	41.6093	20	43.9675	1000.73	20	149.682	37.6532	28.3643	41.3892	49.3808	20	54.4102	28.4191	24.5	26.6	28.0622	36.5528	819.976	6761.04	66.4657	23.4289	43.202	20	124.944	52.4885	108.692	123.746	34.4393	290.9	66.9323	66.5726	279.376	0.588235	66.195
AA070	1	1	59.5084	86.79	20	36.2761	20	23.9445	127.384	20	32.6112	20	30.1868	26.6397	48.4771	20	28.1456	20	26.5	24.1	29.6898	20	185.614	514.158	20	38.391	20	20.3236	40.1365	36.2655	64.2857	23.0905	22.4371	29.3081	82.9891	47.5753	110.69	0.294118	36.674
AA072	1	1	29.4263	20	20	38.4448	34.1409	20.2867	186.74	20	35.0938	27.8979	26.0634	39.9194	31.6219	21.5104	38.7013	20	26.9	20	20	20	479.384	1679.66	20	30.9074	23.9788	20	42.4706	46.4153	44.2155	32.5627	33.9233	20	20	42.7548	93.2701	0.235294	36.7683
AA073	1	1	45.9491	56.5273	23.4998	96.3969	21.3214	20	64.2725	20	32.4856	23.4011	20	20.6195	20	20	61.0065	20	23.2	22.5	20	20	54.5667	48.9558	35.6806	45.2858	37.2764	20	53.4922	23.8073	36.2117	26.4408	29.0526	20	71.8805	37.5648	56.0882	0.294118	31.3858
AA077	1	1	54.0442	76.748	83.5688	51.9262	21.7721	33.4987	265.449	20	87.4862	70.4863	37.777	33.5617	34.0603	20	67.206	24.061	25.7	22.5	29.6852	20	337.154	1658.17	57.313	38.8505	61.3449	42.2389	72.7398	62.5359	59.5528	53.9253	45.4298	69.9607	58.4854	59.8222	92.6623	0.617647	55.3554
AA080	1	1	54.0814	150.888	83.6394	76.3118	31.9023	68.4399	86.6339	20	41.8638	42.7466	80.367	26.8775	48.0613	20	40.5972	72.0064	50.8	38.4	77.9815	41.4094	413.004	996.305	72.6719	47.0431	87.663	30.2766	149.653	66.8416	75.6521	75.8057	57.925	54.9519	107.153	61.4519	182.803	0.823529	68.0256
AA089	1	1	21.6308	53.5934	21.4843	41.692	21.9606	20	648.657	20	60.4721	20	20	21.1452	23.0634	20	48.202	24.9027	20	20	30.1078	29.6509	342.19	1341.97	27.7242	20.7322	45.5923	20	46.2919	20	69.4093	22.3959	20	37.9556	33.0436	30.8602	112.251	0.323529	38.5385
AA092	1	1	68.1268	86.5371	40.8434	48.2031	22.8468	23.8079	690.654	20	75.6412	20	49.1809	21.9669	31.733	20	69.7301	35.2168	20.2	25	36.1088	31.8698	422.559	2957.24	85.0185	37.2828	67.5978	20	68.6032	45.2243	38.2923	39.9914	30.8865	20	33.7286	42.5427	93.7491	0.441176	49.4536
AA118	1	1	21.9586	52.7471	24.5865	44.0986	20	20	115.635	20	20	20	20	20	20	20	45.9089	20	20	20	20.4327	20	344.479	1113.5	31.5105	20	50.339	20	54.4625	22.4862	29.2328	20	20.0326	72.8479	41.6077	21.5415	97.7517	0.323529	33.9624
AA118	1	3	34.6218	67.7187	20	54.918	20	28.8375	271.634	20	54.1796	31.3906	44.9423	58.7623	32.024	34.7982	69.6757	38.9336	47.6661	20	55.9188	43.3384	338.2	2079.42	20	62.395	60.2256	42.0903	68.0527	76.5276	68.8205	53.2801	60.6673	206.261	61.1617	94.4411	74.1346	0.705882	59.0489
AA103	1	1	47.7539	46.817	26.3939	54.394	20	20	81.6729	20	31.3857	22.1777	20	23.8149	22.5422	20	64.6994	20	38.6	20	25.7927	32.7509	172.569	302.155	27.7817	25.3699	30.7888	20	59.4224	31.8366	125.881	130.908	37.7576	204.82	38.0716	45.6302	40.3205	0.352941	39.6109
AA111	1	1	49.2396	63.9106	33.7958	55.5174	43.4153	44.6857	505.399	20	62.8928	26.8821	50.9915	42.5554	52.9696	55.6785	38.388	58.687	50.2	22.3	51.7858	33.724	382.982	351.678	54.0908	50.2233	45.7121	38.7546	60.8198	43.0697	74.3498	42.5949	41.6422	45.391	44.7636	39.4472	120.909	0.764706	55.8014
AA113	1	1	103.489	39.6778	20	74.0234	74.273	69.1983	1262.06	64.5799	87.3336	33.6378	71.2967	50.5022	57.7028	52.3744	67.6409	65.1211	62.1	45	49.9842	38.3247	259.148	659.429	28.9216	57.9891	20.5652	45.001	44.0836	60.549	71.9042	73.0385	44.4238	69.8272	49.731	80.7546	94.3768	0.823529	66.1989
